# Supplementary material for: PI3K p110α Blockade Enhances Anti-Tumor Efficacy of Abemaciclib in Human Colorectal Cancer Cells
Source: PubMed Central journal article supplement (PMC7564416; doi:10.3390/cancers12092500), 2020-09-03
Supplement: cancers-12-02500-s001.pdf [file cancers-12-02500-s001.pdf]

## Supplementary Information for

Article

# PI3K p110 $\alpha$ Blockade Enhances Anti-Tumor Efficacy of Abemaciclib in Human Colorectal Cancer Cells

Hyun Jung Lee <sup>1,2,†</sup>, Kui-Jin Kim <sup>3,4,†</sup>, Ji Hea Sung <sup>3</sup>, Milang Nam <sup>3</sup>, Koung Jin Suh <sup>3</sup>,

Ji-Won Kim <sup>3</sup>, Se Hyun Kim <sup>3</sup>, Jin Won Kim <sup>3</sup>, Yu Jung Kim <sup>3</sup>, Keun-Wook Lee <sup>1,3</sup>, Jong Seok Lee <sup>1,3</sup>

and Jee Hyun Kim <sup>1,3,\*</sup>

<sup>1</sup> Department of Internal Medicine, Seoul National University College of Medicine, Seoul, 03080, Republic of Korea; hyunjunglee@med.dongguk.ac.kr (H.J.L.); imdoctor@snu.ac.kr (K.W.L.); jslee@snubh.org (J.S.L.); jhkimmd@snu.ac.kr (J.H.K)

<sup>2</sup> Department of Internal Medicine, Dongguk University Ilsan Hospital, Goyang, 10326, Republic of Korea

<sup>3</sup> Division of Hematology and Medical Oncology, Department of Internal Medicine, Seoul National University Bundang Hospital, Seoul National University College of Medicine, Seongnam, 13620, Republic of Korea; kjkim@snubh.org (K.J.K.); R0907@snubh.org (J.H.S.); R2786@snubh.org (M.L.N.); sehyunkim@snubh.org (S.H.K.); skjmd0919@snubh.org (K.J.S.); jiwonkim@snubh.org (J.W.K.); jwkim@snubh.org (J.W.K.); cong1005@snubh.org (Y.J.K.); imdoctor@snu.ac.kr (K.W.L.); jslee@snubh.org (J.S.L.); jhkimmd@snu.ac.kr (J.H.K)

<sup>4</sup> Biomedical Research Institute, Seoul National University Bundang Hospital, Seongnam, 13620, Republic of Korea; kjkim@snubh.org (K.J.K)

\* Correspondence: jhkimmd@snu.ac.kr; Tel: +82-31-787-7022 Fax: +82-31-787-4052

† These authors have contributed equally to this work.

**Table S1.** Key genetic alterations in 9 colorectal cancer cell lines.

|               | Primary resistance cell lines to CDK4/6 inhibitors |                |                |       |                | Sensitive cell lines to CDK4/6 inhibitors |                |        |                 |
|---------------|----------------------------------------------------|----------------|----------------|-------|----------------|-------------------------------------------|----------------|--------|-----------------|
|               | HCT-15                                             | DLD-1          | HCT-8          | SW480 | SNU-175        | SNU-C5                                    | HT-29          | Caco-2 | SNU-C4          |
| <i>CCND1</i>  | WT                                                 | -              | -              | WT    | WT             | WT                                        | WT             | WT     | WT              |
| <i>CDKN2A</i> | WT                                                 | -              | -              | WT    | DEL            | Silent                                    | WT             | WT     | WT              |
| <i>RB1</i>    | WT                                                 | -              | -              | WT    | R798Q<br>D921D | WT                                        | WT             | WT     | WT              |
| <i>KRAS</i>   | G13D                                               | G13D           | G13D           | G12V  | A59T           | WT                                        | WT             | WT     | WT              |
| <i>BRAF</i>   | WT                                                 | WT             | WT             | WT    | WT             | V600E                                     | V600E<br>T119S | WT     | D22N            |
| <i>PIK3CA</i> | E545K<br>D549N                                     | E545K<br>D549N | E545K<br>D549N | WT    | WT             | H1047R                                    | P449T          | WT     | E545G<br>V71I   |
| <i>PETN</i>   | WT                                                 | WT             | WT             | WT    | WT             | WT                                        | WT             | WT     | F288fs<br>F288S |

**Table S2.** The synergistic activity of abemaciclib with BYL719 in HT-29, Caco-2, and, SNU-C4 cell lines.

| HT-29 |       |           | Caco-2             |                    |      | SNU-C4 |           |                    |                    |      |       |           |                    |                    |
|-------|-------|-----------|--------------------|--------------------|------|--------|-----------|--------------------|--------------------|------|-------|-----------|--------------------|--------------------|
| Fa    | CI    | Est. S.D. | Abemaciclib        | BYL719             | Fa   | CI     | Est. S.D. | Abemaciclib        | BYL719             | Fa   | CI    | Est. S.D. | Abemaciclib        | BYL719             |
| 0.02  | 0.011 | 0.025     | $2 \times 10^{-6}$ | $10^{-5}$          | 0.02 | 0.513  | 0.579     | $2 \times 10^{-4}$ | $9 \times 10^{-4}$ | 0.02 | 0.336 | 1.306     | $2 \times 10^{-4}$ | $2 \times 10^{-4}$ |
| 0.05  | 0.025 | 0.04      | $3 \times 10^{-5}$ | $2 \times 10^{-4}$ | 0.05 | 0.472  | 0.387     | 0.001              | 0.006              | 0.05 | 0.313 | 0.805     | 0.001              | 0.001              |
| 0.1   | 0.048 | 0.057     | $3 \times 10^{-4}$ | 0.001              | 0.1  | 0.447  | 0.271     | 0.005              | 0.026              | 0.1  | 0.299 | 0.549     | 0.005              | 0.005              |
| 0.15  | 0.072 | 0.068     | $9 \times 10^{-4}$ | 0.004              | 0.15 | 0.437  | 0.212     | 0.012              | 0.065              | 0.15 | 0.293 | 0.432     | 0.013              | 0.011              |
| 0.2   | 0.098 | 0.077     | 0.002              | 0.012              | 0.2  | 0.432  | 0.173     | 0.024              | 0.131              | 0.2  | 0.29  | 0.359     | 0.026              | 0.022              |
| 0.25  | 0.127 | 0.084     | 0.005              | 0.026              | 0.25 | 0.429  | 0.145     | 0.043              | 0.233              | 0.25 | 0.288 | 0.307     | 0.045              | 0.038              |
| 0.3   | 0.158 | 0.089     | 0.01               | 0.051              | 0.3  | 0.43   | 0.124     | 0.072              | 0.385              | 0.3  | 0.287 | 0.267     | 0.073              | 0.062              |
| 0.35  | 0.193 | 0.092     | 0.019              | 0.096              | 0.35 | 0.432  | 0.108     | 0.113              | 0.608              | 0.35 | 0.286 | 0.235     | 0.113              | 0.096              |
| 0.4   | 0.234 | 0.094     | 0.035              | 0.174              | 0.4  | 0.435  | 0.096     | 0.174              | 0.933              | 0.4  | 0.286 | 0.209     | 0.17               | 0.145              |

|            |              |              |              |              |            |              |              |             |              |            |              |              |              |              |
|------------|--------------|--------------|--------------|--------------|------------|--------------|--------------|-------------|--------------|------------|--------------|--------------|--------------|--------------|
| 0.45       | 0.28         | 0.095        | 0.061        | 0.306        | 0.45       | 0.44         | 0.088        | 0.261       | 1.405        | 0.45       | 0.286        | 0.187        | 0.252        | 0.215        |
| <u>0.5</u> | <u>0.335</u> | <u>0.096</u> | <u>0.107</u> | <u>0.533</u> | <u>0.5</u> | <u>0.447</u> | <u>0.083</u> | <u>0.39</u> | <u>2.099</u> | <u>0.5</u> | <u>0.286</u> | <u>0.171</u> | <u>0.371</u> | <u>0.316</u> |
| 0.55       | 0.401        | 0.098        | 0.186        | 0.928        | 0.55       | 0.457        | 0.083        | 0.583       | 3.135        | 0.55       | 0.287        | 0.159        | 0.545        | 0.464        |
| 0.6        | 0.482        | 0.108        | 0.327        | 1.634        | 0.6        | 0.469        | 0.087        | 0.879       | 4.722        | 0.6        | 0.288        | 0.153        | 0.807        | 0.687        |
| 0.65       | 0.583        | 0.134        | 0.59         | 2.948        | 0.65       | 0.484        | 0.095        | 1.347       | 7.239        | 0.65       | 0.289        | 0.155        | 1.215        | 1.035        |
| 0.7        | 0.716        | 0.19         | 1.108        | 5.539        | 0.7        | 0.505        | 0.107        | 2.126       | 11.43        | 0.7        | 0.291        | 0.165        | 1.882        | 1.603        |
| 0.75       | 0.899        | 0.296        | 2.218        | 11.09        | 0.75       | 0.534        | 0.124        | 3.515       | 18.89        | 0.75       | 0.294        | 0.185        | 3.047        | 2.596        |
| 0.8        | 1.166        | 0.489        | 4.912        | 24.56        | 0.8        | 0.575        | 0.147        | 6.248       | 33.59        | 0.8        | 0.298        | 0.22         | 5.29         | 4.506        |
| 0.85       | 1.602        | 0.873        | 12.86        | 64.29        | 0.85       | 0.639        | 0.183        | 12.54       | 67.41        | 0.85       | 0.304        | 0.276        | 10.31        | 8.787        |
| 0.9        | 2.447        | 1.792        | 46.16        | 230.8        | 0.9        | 0.756        | 0.246        | 31.64       | 170          | 0.9        | 0.313        | 0.372        | 25.04        | 21.33        |
| 0.95       | 4.888        | 5.312        | 363.8        | 1819         | 0.95       | 1.051        | 0.415        | 141         | 758          | 0.95       | 0.332        | 0.593        | 104.9        | 89.39        |
| 0.99       | 23.37        | 51.85        | 34787        | 2E+05        | 0.99       | 2.614        | 1.54         | 3830        | 20584        | 0.99       | 0.395        | 1.572        | 2486         | 2117         |

---

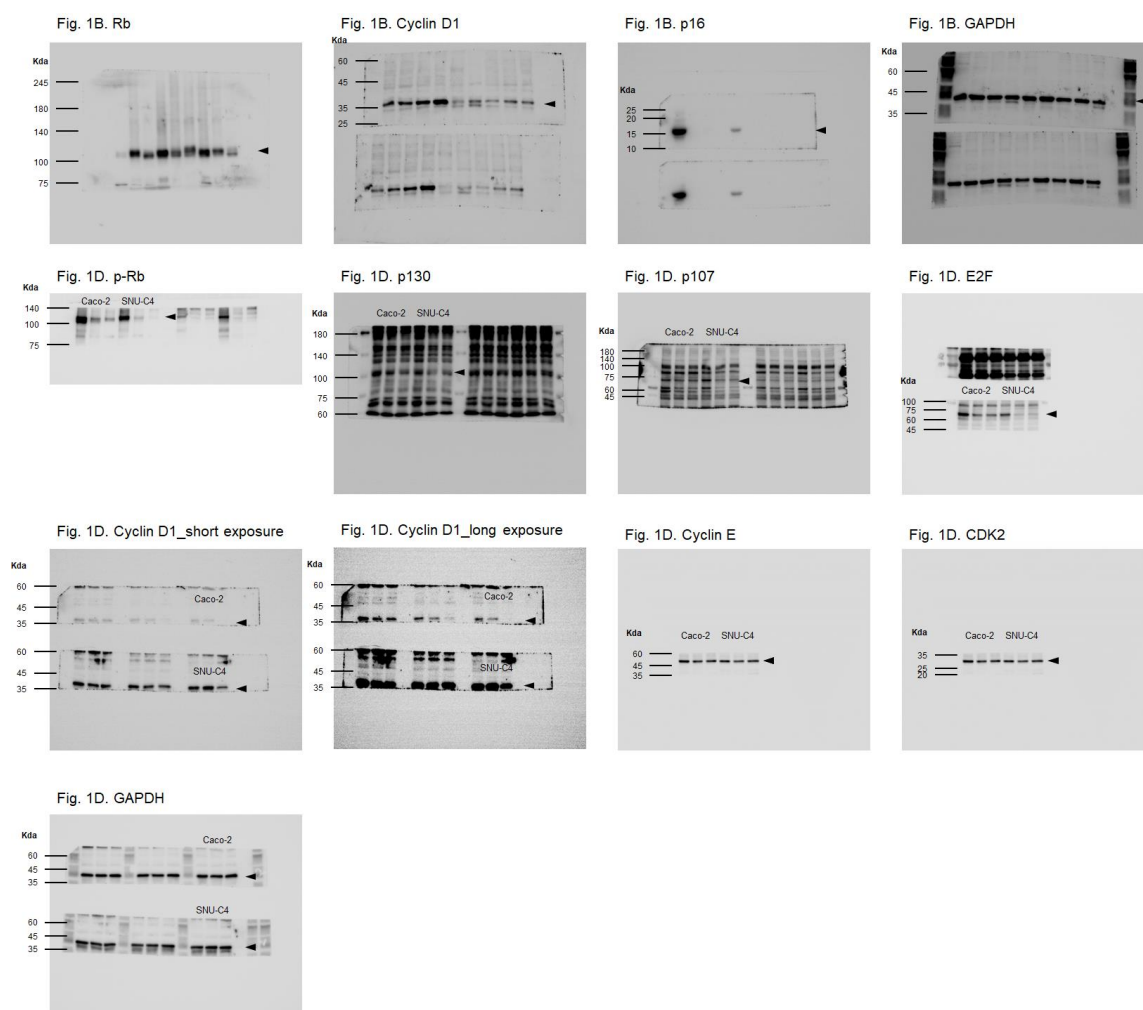

**Figure S1.** Uncropped Western blot images of indicated proteins in whole cell lysates from Caco-2 and SNU-C4 cells treated with and without abemaciclib, related to Figure 1B and 1D.

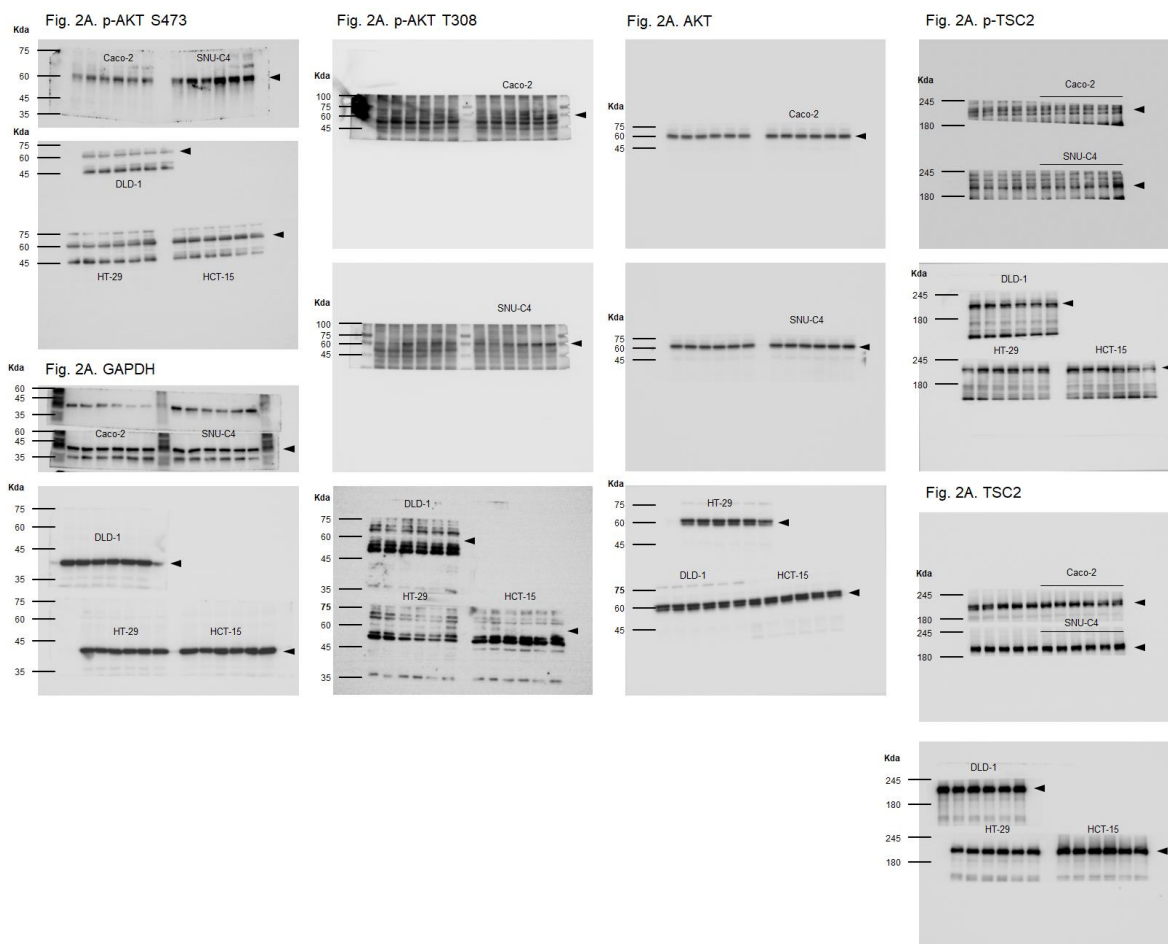

**Figure S2.** Uncropped Western blot images of indicated proteins in whole cell lysates from HCT-15, DLD-1, HT-29, Caco-2, and SNU-C4 cells treated with and without abemaciclib, related to Figure 2A.

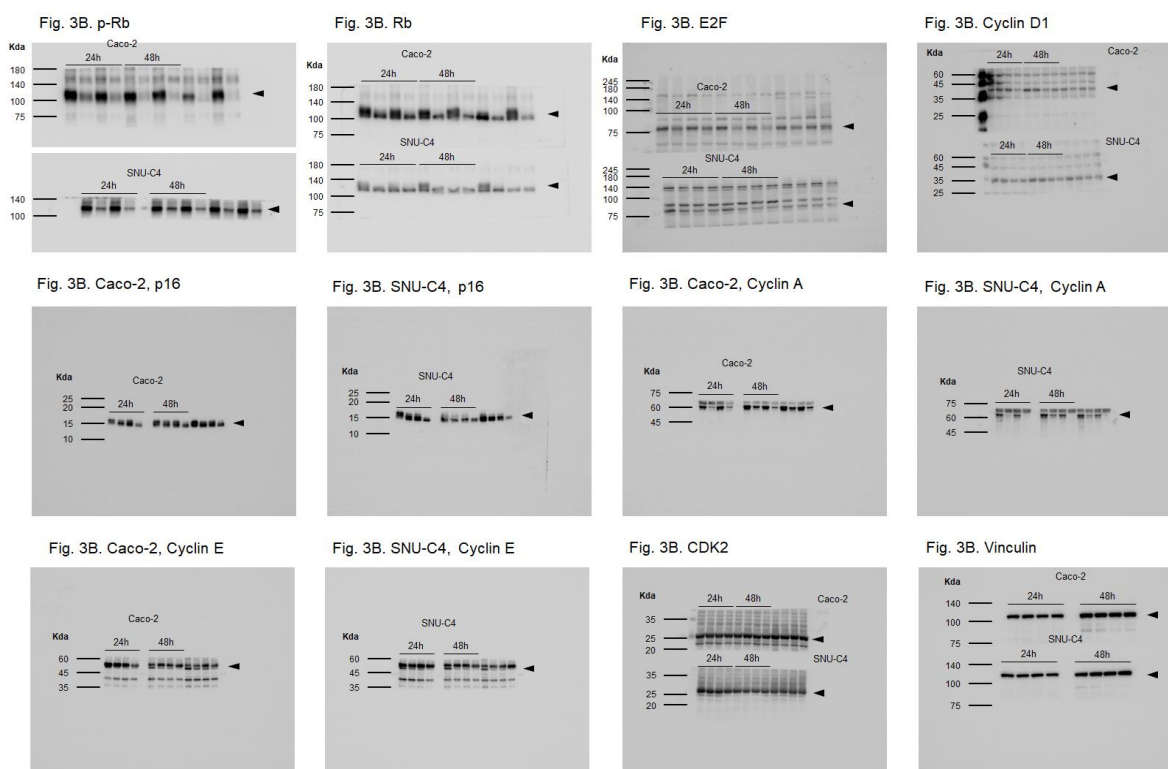

**Figure 3S.** Uncropped Western blot images of indicated proteins in whole cell lysates from Caco-2 and SNU-C4 cells treated with abemaciclib and/or BYL719, related to Figure 3B.
